# Supplementary material for: Interorganizational Networks in Physical Activity Promotion: A Systematic Review
Source: Int J Environ Res Public Health. 2021 Jul 8;18(14):7306. doi: 10.3390/ijerph18147306 (PMC8306254; doi:10.3390/ijerph18147306)
Supplement: Supplementary file 1 [file ijerph-18-07306-s001.zip › Table_S1_Searchterm_submission.pdf]

## Supplemental Material

**Table S1. Extended search term.**

| Database       | Search term                                                                                                                                                                                                                                                                                                                                                                                                                                                                                                                                                                                                   |
|----------------|---------------------------------------------------------------------------------------------------------------------------------------------------------------------------------------------------------------------------------------------------------------------------------------------------------------------------------------------------------------------------------------------------------------------------------------------------------------------------------------------------------------------------------------------------------------------------------------------------------------|
| Web of Science | (TS=("network analys*") AND TS=(communit* OR collaboration* OR alliance* OR coalition* OR interorgani?ation* OR inter-organi?ation*) AND TS=("physical activit*" OR "health promotion" OR "health behavi*" OR "public health")) AND LANGUAGE: (English)                                                                                                                                                                                                                                                                                                                                                       |
| Pubmed         | ((("network analysis"[Title/Abstract] OR "network analyses"[Title/Abstract])) AND (communit*[Title/Abstract] OR collaboration*[Title/Abstract] OR alliance*[Title/Abstract] OR coalition*[Title/Abstract] OR interorganisation*[Title/Abstract] OR interorganization*[Title/Abstract] OR inter-organisation*[Title/Abstract] OR inter-organization*[Title/Abstract])) AND ("physical activity"[Title/Abstract] OR "physical activities"[Title/Abstract] OR "health promotion"[Title/Abstract] OR "health behavior"[Title/Abstract] OR "health behaviour"[Title/Abstract] OR "public health"[Title/Abstract])) |
| Scopus         | (TITLE-ABS-KEY("network analysis") AND TITLE-ABS-KEY(communit* OR collaboration* OR alliance* OR coalition* OR interorganisation* OR interorganization* OR inter-organisation* OR inter-organization*)AND TITLE-ABS-KEY("physical activit*" OR "health promotion" OR "health behavi*" OR "public health"))                                                                                                                                                                                                                                                                                                    |
