# Supplementary material for: Interorganizational Networks in Physical Activity Promotion: A Systematic Review
Source: Int J Environ Res Public Health. 2021 Jul 8;18(14):7306. doi: 10.3390/ijerph18147306 (PMC8306254; doi:10.3390/ijerph18147306)
Supplement: Supplementary file 1 [file ijerph-18-07306-s001.zip › Table_S2_QA Tool for SNA Studies_submission.pdf]

## Supplemental Material

**Table S2. Quality assessment tool for social network analysis studies.**

Name of author(s):

Year of publication:

Name of paper/study:

| Appraisal question                                                                                                    | Criteria for answers |    |                           | Additional notes                                                                                                                                                                                                                                    |
|-----------------------------------------------------------------------------------------------------------------------|----------------------|----|---------------------------|-----------------------------------------------------------------------------------------------------------------------------------------------------------------------------------------------------------------------------------------------------|
|                                                                                                                       | Yes                  | No | Other<br>(CD, NR,<br>NA)* |                                                                                                                                                                                                                                                     |
| 1. Was there a clear statement of the aims of the research?                                                           |                      |    |                           | <ul style="list-style-type: none"> <li>- What was the goal of the research?</li> <li>- Why was it thought important?</li> <li>- Its relevance</li> </ul>                                                                                            |
| 2. Was there a clear description of the Boundary setting / the Actor identification?                                  |                      |    |                           | <ul style="list-style-type: none"> <li>- Of networks (nominalist/realist strategy)/ Organizations (how were the participating organizations selected?) (snowball method?)</li> </ul>                                                                |
| 3. Was the participation rate of eligible actors at least 75%?                                                        |                      |    |                           | <ul style="list-style-type: none"> <li>- &gt; 75 %</li> </ul>                                                                                                                                                                                       |
| 4. Was there a clear statement how data were collected (directly from the subjects as opposed to a proxy)?            |                      |    |                           | <ul style="list-style-type: none"> <li>- Subjects (management role, CEO, external (expert survey))</li> <li>- Proxy (documents, database)</li> </ul>                                                                                                |
| 5. Was the investigated network clearly described?                                                                    |                      |    |                           | <ul style="list-style-type: none"> <li>- Was it formed unintended or strategically?</li> </ul>                                                                                                                                                      |
| 6. Definitions<br>6.1<br>Was an acceptable definition of health promotion/activity used in the study?                 |                      |    |                           | <ul style="list-style-type: none"> <li>- Wide definition of sport (additional interventions possible, e.g., nutritional advice, psychological interventions, counseling)</li> </ul>                                                                 |
| 6.2<br>Was an acceptable definition of social network analysis or a similar theoretical foundation used in the study? |                      |    |                           | <ul style="list-style-type: none"> <li>- Definition of social network analysis</li> </ul>                                                                                                                                                           |
| 6.3<br>Was an acceptable definition of variables used in the study?                                                   |                      |    |                           | <ul style="list-style-type: none"> <li>- Were the investigated variables clearly defined? (e.g., cooperation, partnership)</li> <li>- Were the network measures clearly defined? (e.g., degrees of network centrality. Valid, reliable?)</li> </ul> |
| 7. Was the same mode of data collection used for all subjects?                                                        |                      |    |                           | <ul style="list-style-type: none"> <li>- Face-to-face interviews, telephone interviews, questionnaires, tape recordings, video material, notes, etc.</li> </ul>                                                                                     |

|                                                       |  |  |  |                                                                                                                                                                                                                                                                                                                                                                                                                                |
|-------------------------------------------------------|--|--|--|--------------------------------------------------------------------------------------------------------------------------------------------------------------------------------------------------------------------------------------------------------------------------------------------------------------------------------------------------------------------------------------------------------------------------------|
| 8. Have ethical issues been taken into consideration? |  |  |  | <ul style="list-style-type: none"> <li>- Discussion of how the anonymity of participants/sources was protected</li> <li>- Discussion of confidentiality of data and procedures for protecting</li> </ul>                                                                                                                                                                                                                       |
| 9. Is there a clear statement of findings?            |  |  |  | <ul style="list-style-type: none"> <li>- Are the findings explicit?</li> <li>- Is there an adequate discussion of the evidence both for and against the researchers' arguments?</li> <li>- Has the researcher discussed the credibility of their findings? (e.g., triangulation, respondent validation, more than one analyst)</li> <li>- Are the findings discussed in relation to the original research question?</li> </ul> |
| Quality Rating:                                       |  |  |  |                                                                                                                                                                                                                                                                                                                                                                                                                                |
| Rater #1 initials:                                    |  |  |  |                                                                                                                                                                                                                                                                                                                                                                                                                                |
| Rater #2 initials:                                    |  |  |  |                                                                                                                                                                                                                                                                                                                                                                                                                                |

\* CD, cannot determine; NA, not applicable; NR, not reported
